# Supplementary material for: Combined Effect of Biological and Organic Fertilizers on Agrobiochemical Traits of Corn (Zea mays L.) under Wastewater Irrigation
Source: MDPI journal article supplement (doi:10.3390/plants13101331), 2024-05-12
Supplement: s1 [file s1]

## Supplementary Material

### Table of Contents

- Figure S1.** The comparison of means for gallic acid (a) and caffeic acid (b) in plants treated with Ww: Wastewater, Wi: Conventional water, and fertilizers include: C: Control, Bch: Biochar, M: Mycorrhiza, T: *Trichoderma*, N: NPK, MTN: Mycorrhiza + *Trichoderma* + NPK, A: Biochar + Mycorrhiza + *Trichoderma* + NPK.
- Figure S2.** The comparison of means for chlorogenic acid (a) and quercetin (b) in plants treated with Ww: Wastewater, Wi: Conventional water, and fertilizers include: C: Control, Bch: Biochar, M: Mycorrhiza, T: *Trichoderma*, N: NPK, MTN: Mycorrhiza + *Trichoderma* + NPK, A: Biochar + Mycorrhiza + *Trichoderma* + NPK.
- Figure S3.** The comparison of means for rutin (a) and coumaric acid (b) in plants treated with Ww: Wastewater, Wi: Conventional water, and fertilizers include: C: Control, Bch: Biochar, M: Mycorrhiza, T: *Trichoderma*, N: NPK, MTN: Mycorrhiza + *Trichoderma* + NPK, A: Biochar + Mycorrhiza + *Trichoderma* + NPK.
- Figure S4.** The comparison of means for rosmarinic acid (a), cinamic acid (b) and apigenin (c) in plants treated with Ww: Wastewater, Wi: Conventional water, and fertilizers include: C: Control, Bch: Biochar, M: Mycorrhiza, T: *Trichoderma*, N: NPK, MTN: Mycorrhiza + *Trichoderma* + NPK, A: Biochar + Mycorrhiza + *Trichoderma* + NPK.

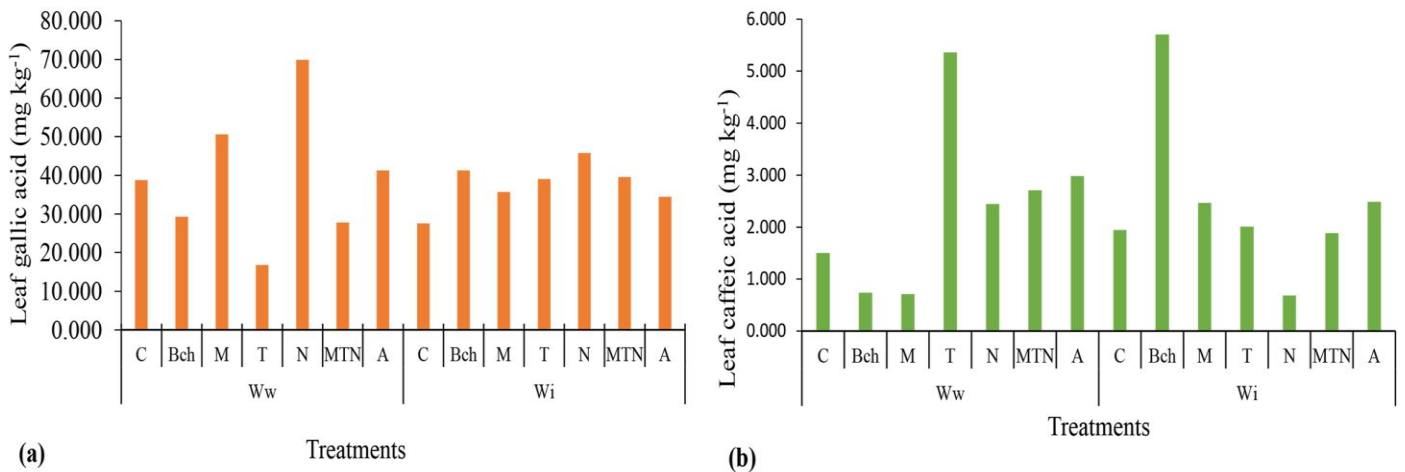

**Figure S1.** The comparison of means for gallic acid (a) and caffeic acid (b) in plants treated with Ww: Wastewater, Wi: Conventional water, and fertilizers include: C: Control, Bch: Biochar, M: Mycorrhiza, T: *Trichoderma*, N: NPK, MTN: Mycorrhiza + *Trichoderma* + NPK, A: Biochar + Mycorrhiza + *Trichoderma* + NPK.

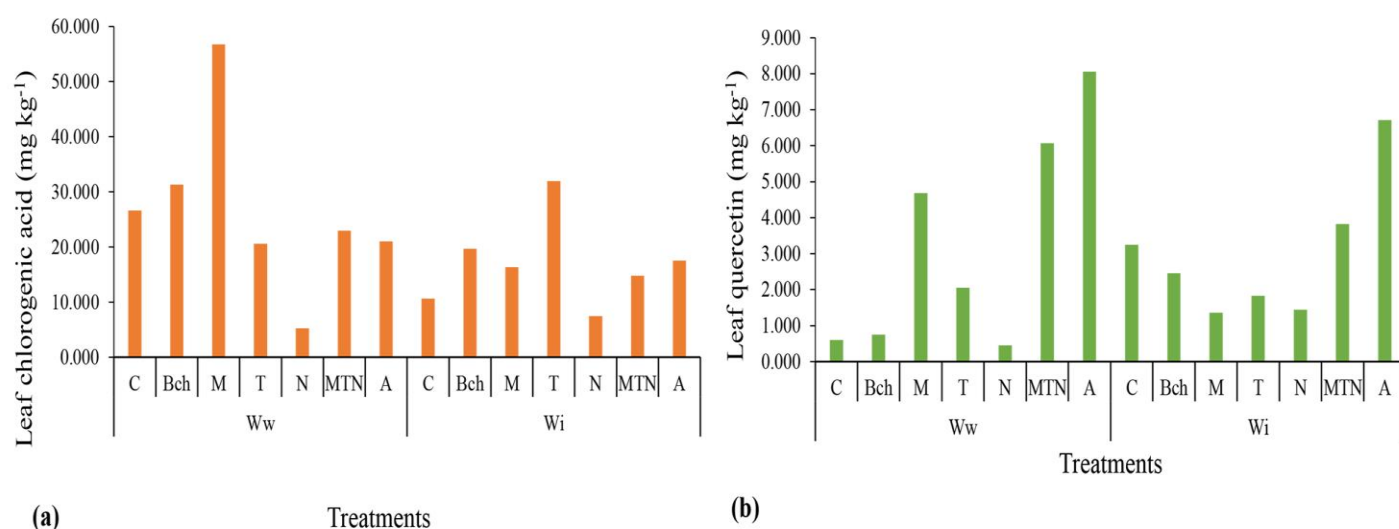

**Figure S2.** The comparison of means for chlorogenic acid (a) and quercetin (b) in plants treated with Ww: Wastewater, Wi: Conventional water, and fertilizers include: C: Control, Bch: Biochar, M: Mycorrhiza, T: *Trichoderma*, N: NPK, MTN: Mycorrhiza + *Trichoderma* + NPK, A: Biochar + Mycorrhiza + *Trichoderma* + NPK.

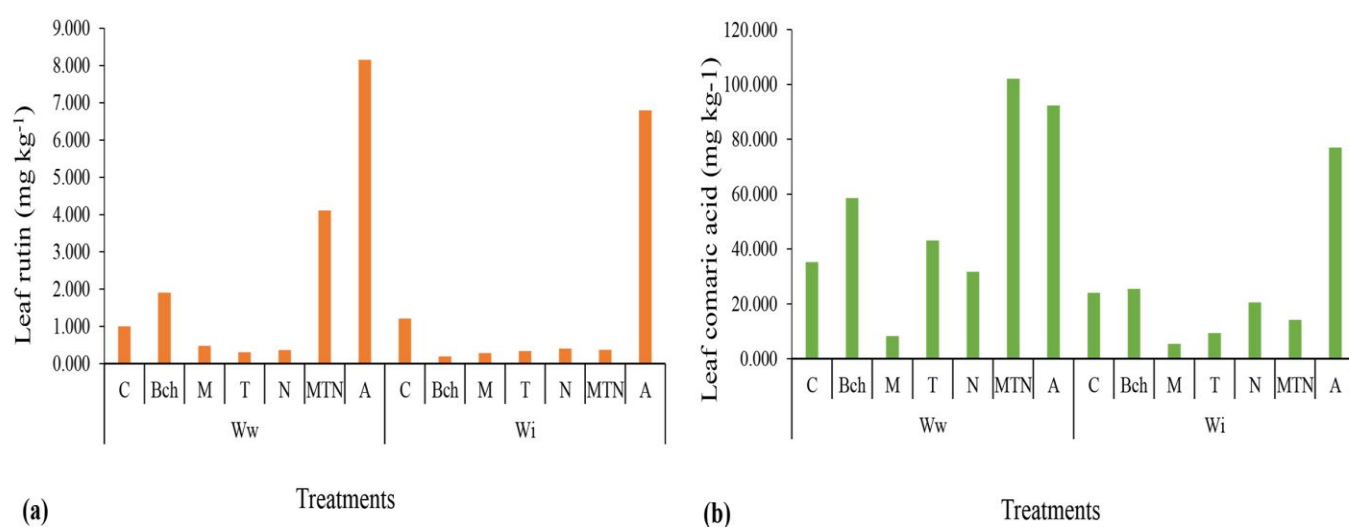

**Figure S3.** The comparison of means for rutin (a) and coumaric acid (b) in plants treated with Ww: Wastewater, Wi: Conventional water, and fertilizers include: C: Control, Bch: Biochar, M: Mycorrhiza, T: *Trichoderma*, N: NPK, MTN: Mycorrhiza + *Trichoderma* + NPK, A: Biochar + Mycorrhiza + *Trichoderma* + NPK.

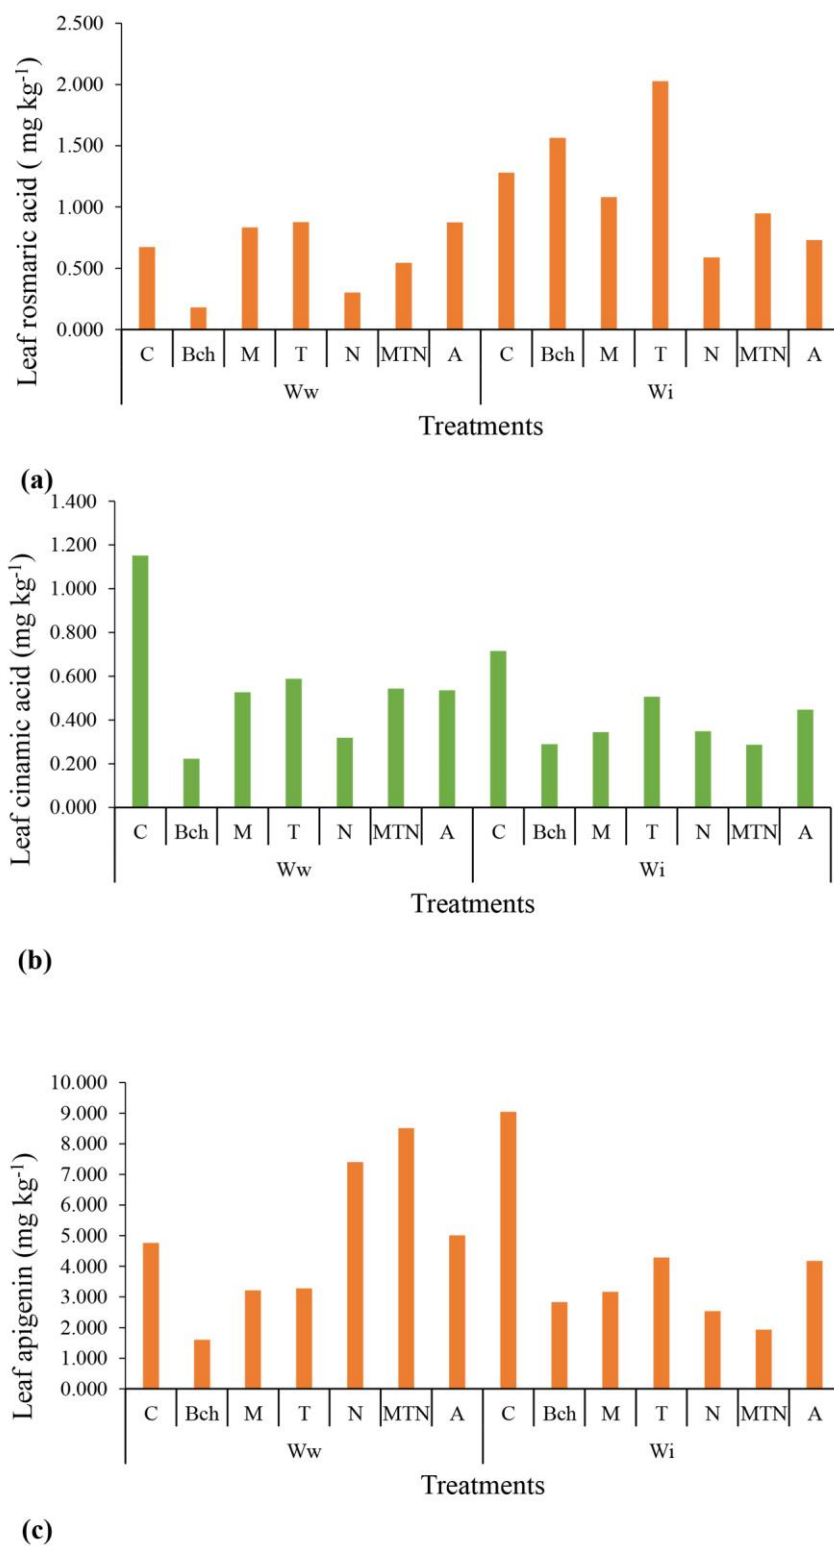

**Figure S4.** The comparison of means for rosmarinic acid (a), cinamic acid (b) and apigenin (c) in plants treated with Ww: Wastewater, Wi: Conventional water, and fertilizers include: C: Control, Bch: Biochar, M: Mycorrhiza, T: *Trichoderma*, N: NPK, MTN: Mycorrhiza + *Trichoderma* + NPK, A: Biochar + Mycorrhiza + *Trichoderma* + NPK.
